# Supplementary material for: Arabidopsis GAAPs interacting with MAPR3 modulate the IRE1-dependent pathway upon endoplasmic reticulum stress
Source: PubMed Central journal article supplement — J Exp Bot. 2019 Sep 7;70(21):6113–25. doi: 10.1093/jxb/erz402 (PMC6859729; doi:10.1093/jxb/erz402), 2019-09-07
Supplement: erz402_suppl_supplementary_table_s1.pdf [file erz402_suppl_supplementary_table_s1.pdf]

Table S1 List of primers used in this research.

| gene/mutant/constructs name | T-DNA lines/AGI number | Purpose          | Primer name  | Primer sequences (5' to 3')                                 |
|-----------------------------|------------------------|------------------|--------------|-------------------------------------------------------------|
| <i>mapr3-1</i>              | SALK_141336C           | Genotyping       | At3G48890LP  | ggcattaacgacaccgtttt                                        |
|                             |                        |                  | At3G48890RP  | CCCTTGATCGCCATAAGAAG                                        |
| <i>mapr3-2</i>              | SALK_056475C           | Genotyping       | At3G48890LP  | ggcattaacgacaccgtttt                                        |
|                             |                        |                  | At3G48890RP  | CCCTTGATCGCCATAAGAAG                                        |
|                             |                        |                  | LBb1         | gcgtggaccgcttgetgcaact                                      |
| GST-IRE1B-KR                | AT5G24360              | pull-down        | IRE1bF10     | CCGGAATC<br>ctaattTTCGGCTTTTGTGTTACTA<br>TGC (EcoRI)        |
|                             |                        |                  | IRE1bR6      | CCGCTCGAG<br>CTAGAATACAGTGGTCTTAGA<br>G (XhoI)              |
| 35s::MAPR3-TAP              | AT3G48890              | IP and pull-down | AT3G48890F2  | actagt<br>CGCTTCTCGATAGCTTCTCAAA<br>T (SpeI)                |
|                             |                        |                  | AT3G48890R3  | ggatcc<br>CTCCTTTGCAGCATCATCAT(Ba<br>mHI)                   |
| nYFP-MAPR3                  | AT3G48890              | BiFC             | AT3G48890F10 | GAGGACGCCGGCggatcc<br>CGCTTCTCGATAGCTTCTCAAA<br>T (BamHI)   |
|                             |                        |                  | AT3G48890R10 | caggtcactctagaggatcc<br>TTACTCCTTTGCAGCATCATCA<br>T (BamHI) |
| MAPR3-cYFP                  | AT3G48890              | BiFC             | AT3G48890F11 | acaggtaccggggatcc<br>CGCTTCTCGATAGCTTCTCAAA<br>T (BamHI)    |
|                             |                        |                  | AT3G48890R11 | gtcactctagaggatcc<br>CTCCTTTGCAGCATCATCAT<br>(BamHI)        |
| IRE1B-KR-cYFP               | AT5G24360              | BiFC             | IRE1bF16     | acaggtaccggggatcc ATG<br>ctaattTTCGGCTTTTGTGTTACTA<br>TGC   |
|                             |                        |                  | IRE1bR16     | gtcactctagaggatccGAATACAGTG<br>GTCTTAGAGTA                  |

|                        |           |                       |               |                                                       |
|------------------------|-----------|-----------------------|---------------|-------------------------------------------------------|
| 35S::FLAG-GAAP1        | AT4G14730 | Co-IP                 | At4g14730F9   | ggatcc ATGGCGAAATCTGACAT<br>TGAAAC (BamHI)            |
|                        |           |                       | At4g14730R9   | gtcgac GTTGCTTATAATGCCGA<br>GG ( Sall)                |
| pMON530-ARA7-RFP       | AT4G19640 | cellular localization | ARA7 F1       | ctatcgattcccggg ATGGCTG<br>CAGCTGGAAACAAGAGCATT<br>AC |
|                        |           |                       | ARA7 R1       | ctcgaggtaccggg agcaca<br>ACAAGATGAGCTCACTGCCCT<br>AT  |
| pMON530-SYP22-RFP      | AT5G46860 | cellular localization | SYP22F        | ctatcgattcccggg atgg<br>GAAGAGGAAGATCAACGAGG<br>AA    |
|                        |           |                       | SYP22R        | ctcgaggtaccggg tg<br>AAGCTGCGAGTACTATAATCA<br>CGA     |
| pMON530-DELTA-TIP1-RFP | AT3G16240 | cellular localization | DELTA-TIP1F   | ctatcgattcccggg at<br>GGCTGGAGTTGCCTTTGG              |
|                        |           |                       | DELTA-TIP1R   | ctcgaggtaccggg g<br>TAGAAATCAGCAGAAGCAAG<br>AGG       |
|                        | AT5G22555 | qRT-PCR               | AT5G22555 qF1 | TAACGCAAGCACTTGGAGCA                                  |
|                        |           | qRT-PCR               | AT5G22555 qR1 | CCCCGTCGATCATCATTTCAT                                 |
|                        | AT4G11320 | qRT-PCR               | AT4G11320 qF1 | GCAAACGATGAAGCCGCTCT                                  |
|                        |           | qRT-PCR               | AT4G11320 qR1 | TCCGCAAGTTCCGTCAAACA                                  |
|                        | AT3G18200 | qRT-PCR               | AT3G18200 qF1 | TCTGTCATGGGCTGGTTGGA                                  |
|                        |           | qRT-PCR               | AT3G18200 qR1 | TCCGGCGTATAGGATGGTGAA                                 |
|                        | AT1G50060 | qRT-PCR               | AT1G50060 qF1 | CTCGTGCGCAGGTTGGAGTA                                  |
|                        |           | qRT-PCR               | AT1G50060 qR1 | GAGATGGCCGAGAACGAGGA                                  |
|                        | AT1G65510 | qRT-PCR               | AT1G65510 qF1 | GCAAACCTTGCAAACGGAAGG                                 |
|                        |           | qRT-PCR               | AT1G65510 qR1 | GCTGTTCTCGGAGGACGTTT                                  |
|                        | AT4G26320 | qRT-PCR               | AT4G26320 qF1 | CTTTCTCTGCGGTGCAACAG                                  |

|       |               |         |                   |                           |
|-------|---------------|---------|-------------------|---------------------------|
|       |               | qRT-PCR | AT4G2632<br>0 qR1 | AAACCCAAAGGCCAAAGTGG      |
| PR-4  | AT3G0472<br>0 | qRT-PCR | PR-4-F:           | GTGGGATGCTGATAAGCCGTA     |
|       |               | qRT-PCR | PR-4-R:           | TGCAGCATTGTCTTGTGTTC<br>T |
| PRX34 | AT3G4912<br>0 | qRT-PCR | PRX34-F:          | ATGCGCAGATATGCTCACCA      |
|       |               | qRT-PCR | PRX34-R:          | AATGGAGCTGGAAGATTGC       |
